# Supplementary material for: Metalla-aromatic loaded magnetic nanoparticles for MRI/photoacoustic imaging-guided cancer phototherapy
Source: Royal Society of Chemistry journal article supplement (doi:10.1039/c7tb02145c), 2017-09-26
Supplement: c7tb02145c1.pdf [file c7tb02145c1.pdf]

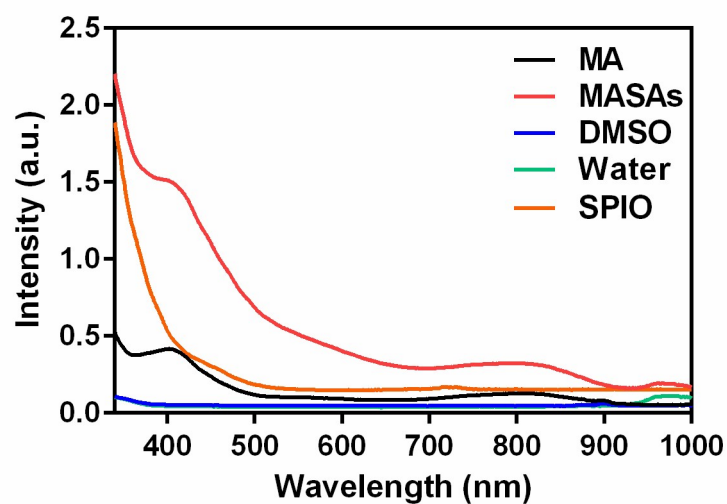

**Fig. S1** UV-visible spectroscopy of MASAs (in water) and free MA (in DMSO) with equivalent MA concentration (300  $\mu\text{g/mL}$ ), DMSO and water.

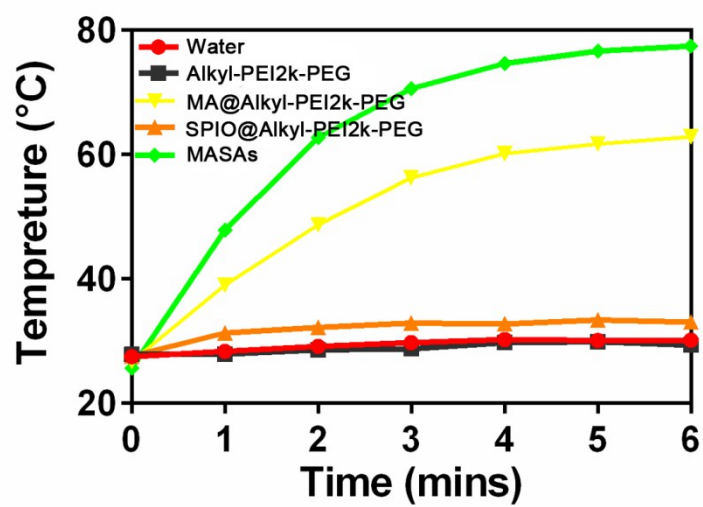

**Fig. S2** Temperature rise profiles of water, MASAs and its compositions (Alkyl-PEI2k-PEG, MA@ Alkyl-PEI2k-PEG and SPIO@ Alkyl-PEI2k-PEG) irradiated with 808 nm laser (1 W/cm<sup>2</sup>, 6 min).

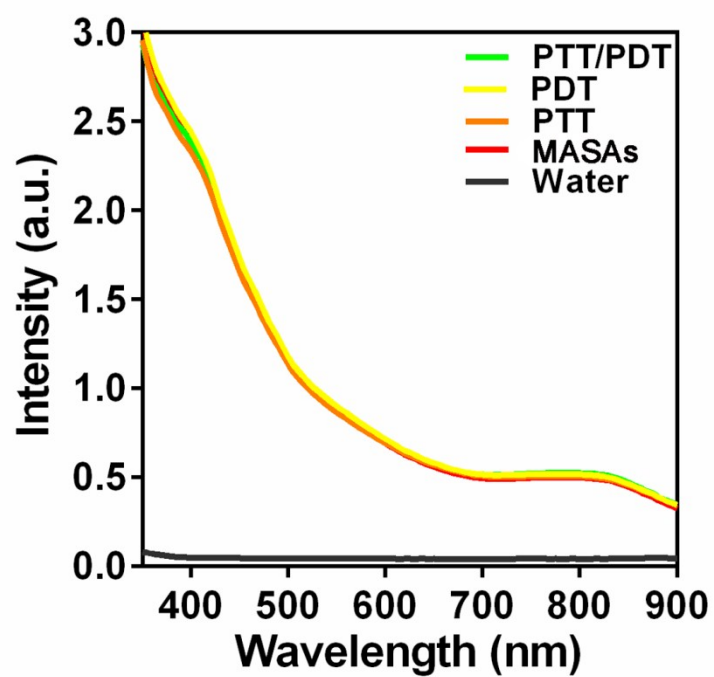

**Fig. S3** UV-visible spectroscopy of MASAs before and after different treatments.

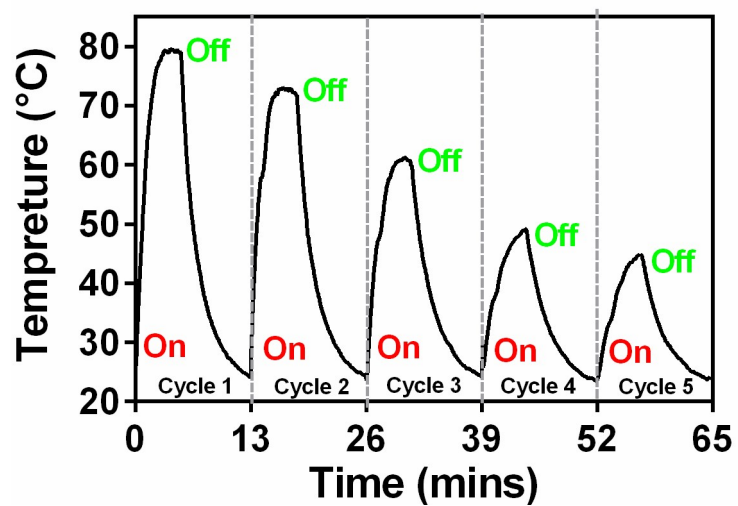

**Fig. S4** Temperature profiles of free indocyanine green (ICG) in 5 cycles.

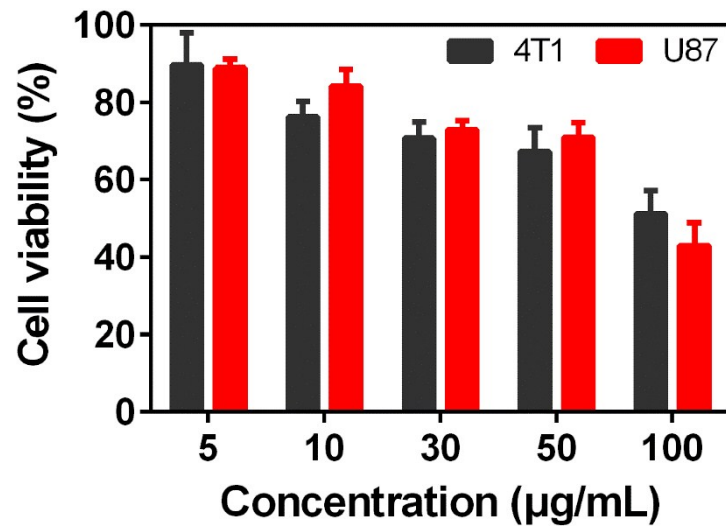

**Fig. S5** Cell viabilities of 4T1 and U87 cells treated with different amounts of free MA.

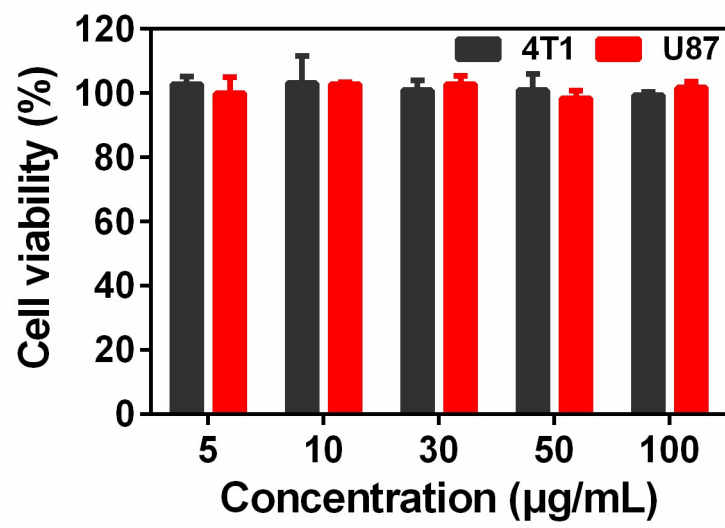

**Fig. S6** Cell viabilities of 4T1 and U87 cells treated with different amounts of MASAs.

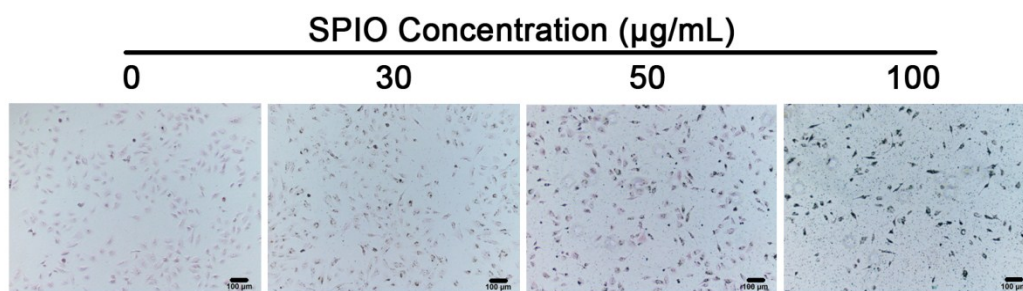

**Fig. S7** Iron staining of SCC-7 cells treated with MASAs at different concentrations, scale bar: 100  $\mu\text{m}$ .

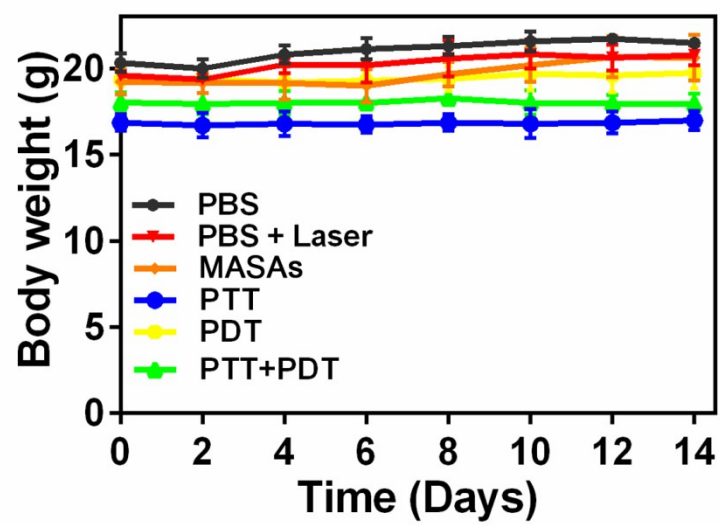

Fig. S8 Mice body weight changes in therapy trial.



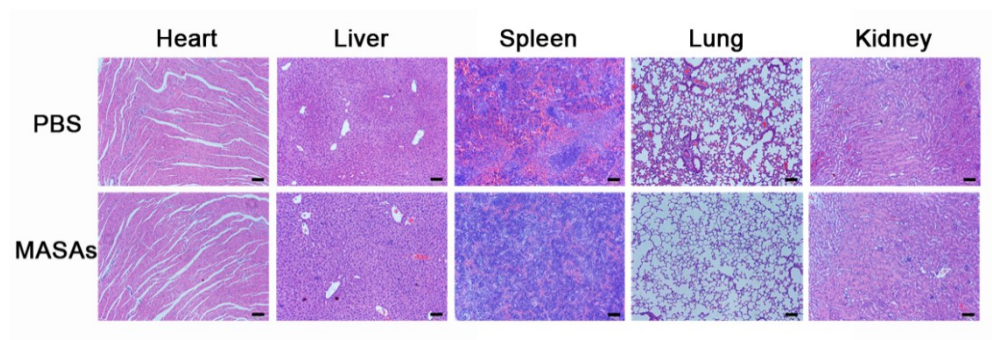

**Fig. S9** H&E staining of major organs from mice treated with PBS or MASAs, scale bar: 100  $\mu$ m.
